# Supplementary material for: How many women take oral supplementation in pregnancy in Austria? Who recommended it? A cross-sectional study
Source: Wien Klin Wochenschr. 2019 May 16;131(19):462–7. doi: 10.1007/s00508-019-1502-9 (PMC6795630; doi:10.1007/s00508-019-1502-9)
Supplement: Supplementary file 2 — Supplemental Table 2 [file 508_2019_1502_MOESM2_ESM.docx]

| Brandname | Price per day | 1) Costs during pregnancy | 2) Costs during pregnancy |
| --- | --- | --- | --- |
| Femibion 1 (Merck, Darmstadt, Germany) | €0.63 - 0.7 | €158.76 – 176.4 | €110.25 - 122.5 |
| Femibion 2 (Merck, Darmstadt, Germany) | €0.55 – 0.61 | €138.6 – 153.72 | €96.25 - 106.75 |
| Elevit pronatal (Bayer, Leverkusen, Germany) | €0.61 | €163.72 | €106.75 |
| Pregnavit SelectPhase II (Ratiopharm, Ulm, Germany) | €0.49 – 0.54 | €123.48 – 155.52 | €85.75 - 94.5 |

1. Started taking medication during pregnancy and before first blood sample was taken (from the 5th week of pregnancy)
2. Started taking medication during pregnancy but after first blood sample was taken (from the 16th week of pregnancy)
Recommended retail prices in pharmacies in Austria, March 2017
